# Supplementary material for: In situ formation and dispersion of lanthanide complexes in wormlike micelles
Source: Royal Society of Chemistry journal article supplement (doi:10.1039/d2sm00687a), 2022-01-01
Supplement: d2sm00687a1.pdf [file d2sm00687a1.pdf]

## Supporting Information for

### *In situ* formation and dispersion of lanthanide complexes in worm-like micelles

Ning Feng,<sup>a,#</sup> Penghui Li,<sup>a,b,#</sup> Aoxue Xu,<sup>a</sup> Longyue Yu,<sup>a</sup> Hongguang Li<sup>a,\*</sup>

---

<sup>a</sup> *Key Laboratory of Colloid and Interface Chemistry, Ministry of Education,  
School of Chemistry and Chemical Engineering, Shandong University, 250100,  
Shandong, China, E-mail: [hgli@sdu.edu.cn](mailto:hgli@sdu.edu.cn)*

<sup>b</sup> *China Research Institute of Daily Chemistry Co., Ltd, Taiyuan 030001, China*

<sup>#</sup> *These authors contribute equally.*

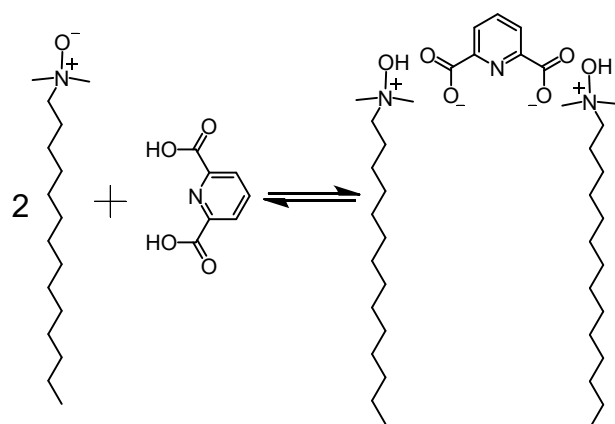

**Scheme S1.** Illustration of the formation of pseudogemini surfactant at a DPA-to-C<sub>14</sub>DMAO ratio of 1:2.

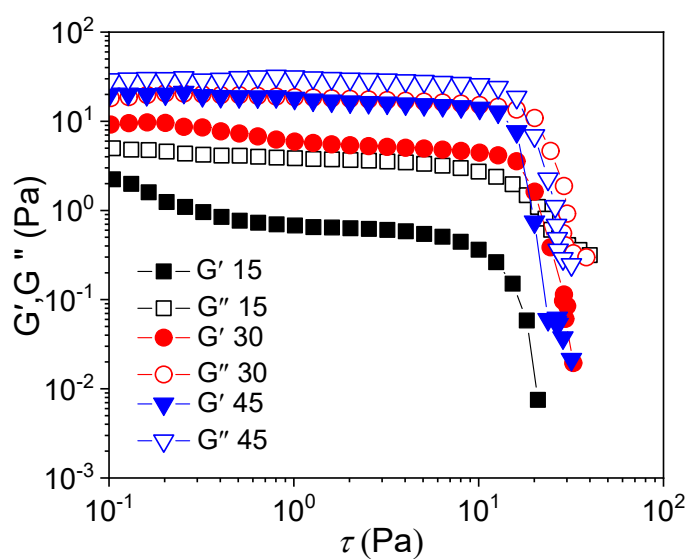

**Fig. S1** Results of stress sweep in oscillatory shear measurements at 1 Hz for three typical wormlike micellar solutions where  $G''$  is dominated within the investigated range of  $\tau$ . The values of  $c_{DPA}$  ( $\text{mmol}\cdot\text{L}^{-1}$ ) are shown inset.

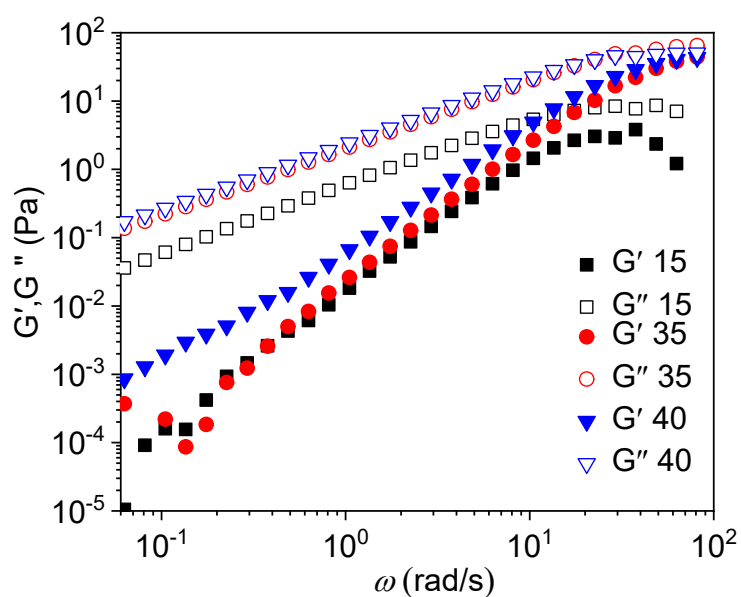

**Fig. S2** Results of frequency sweep in oscillatory shear measurements at 4 Pa for three typical wormlike micellar solutions where  $G''$  is dominated within the investigated range of  $\omega$ . The values of  $c_{DPA}$  ( $\text{mmol}\cdot\text{L}^{-1}$ ) are shown inset.

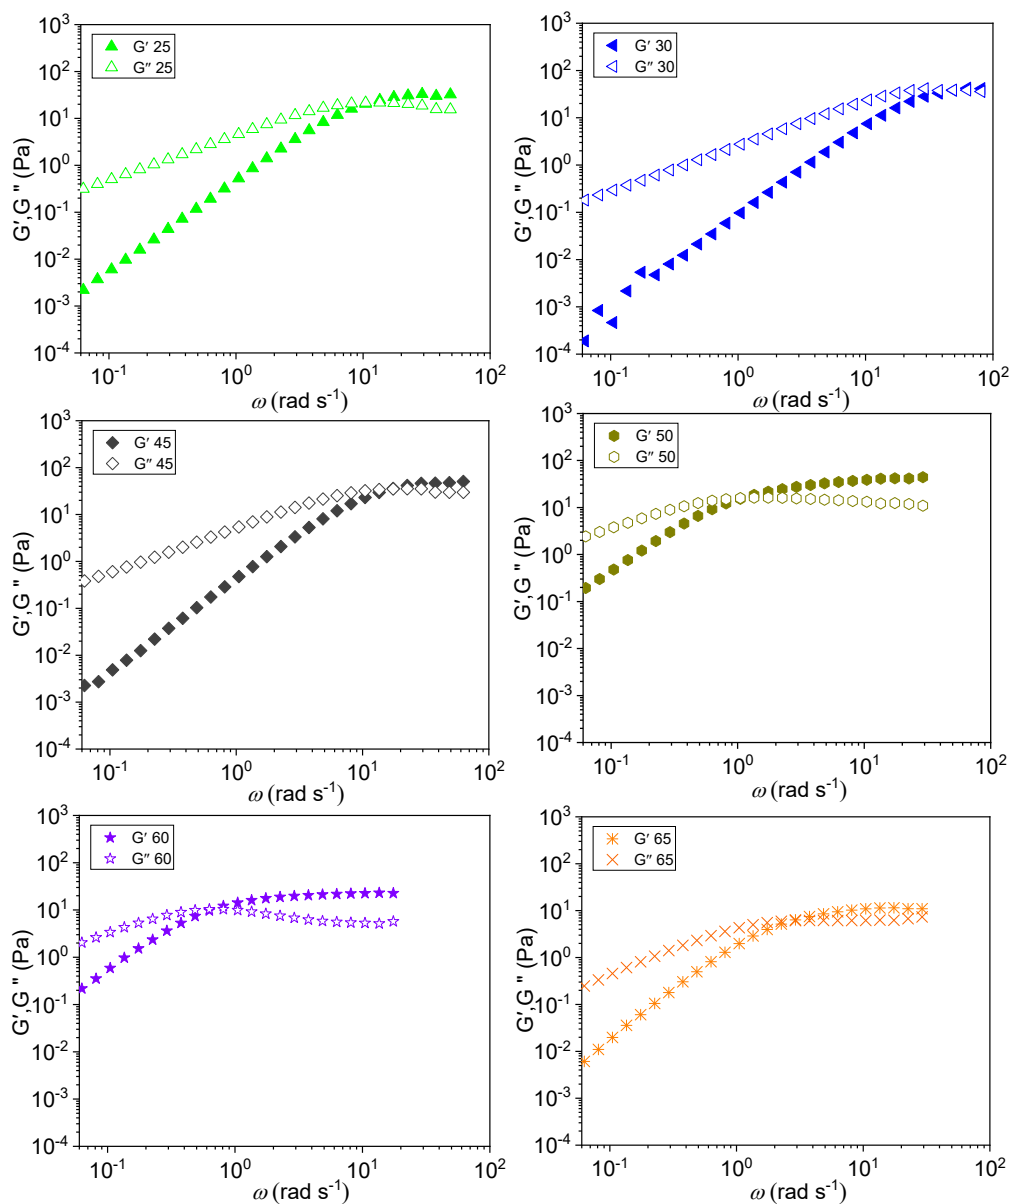

**Fig. S3** Results of frequency sweep in oscillatory shear measurements at 4 Pa for wormlike micellar solutions with different  $c_{DPA}$  ( $\text{mmol}\cdot\text{L}^{-1}$ ) as indicated within each graph.

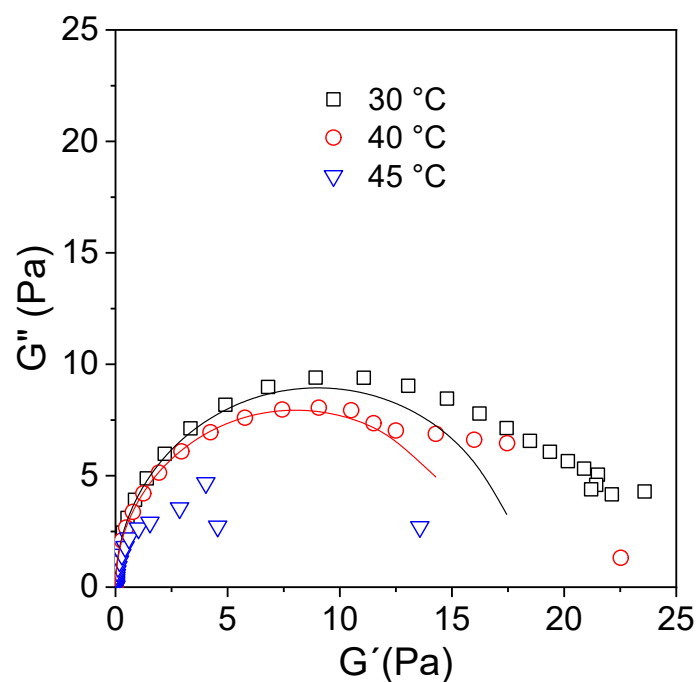

**Fig. S4** Cole-Cole plots of the data obtained from frequency sweep in oscillatory shear measurements at 4 Pa for the wormlike micellar solution ( $100 \text{ mmol}\cdot\text{L}^{-1}$   $\text{C}_{14}\text{DMAO}$  and  $55 \text{ mmol}\cdot\text{L}^{-1}$  DPA) under three typical temperatures as indicated. Solid lines represent the fitting curves.

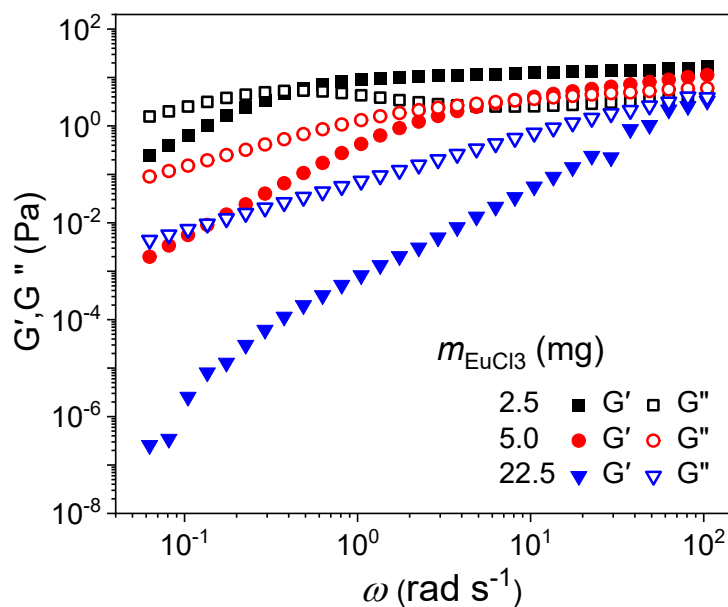

**Fig. S5** Results of frequency sweep in oscillatory shear measurements at 4 Pa for the wormlike micellar solution ( $100 \text{ mmol}\cdot\text{L}^{-1}$   $\text{C}_{14}\text{DMAO}$  and  $55 \text{ mmol}\cdot\text{L}^{-1}$  DPA) containing different amount of  $\text{EuCl}_3$  as indicated.

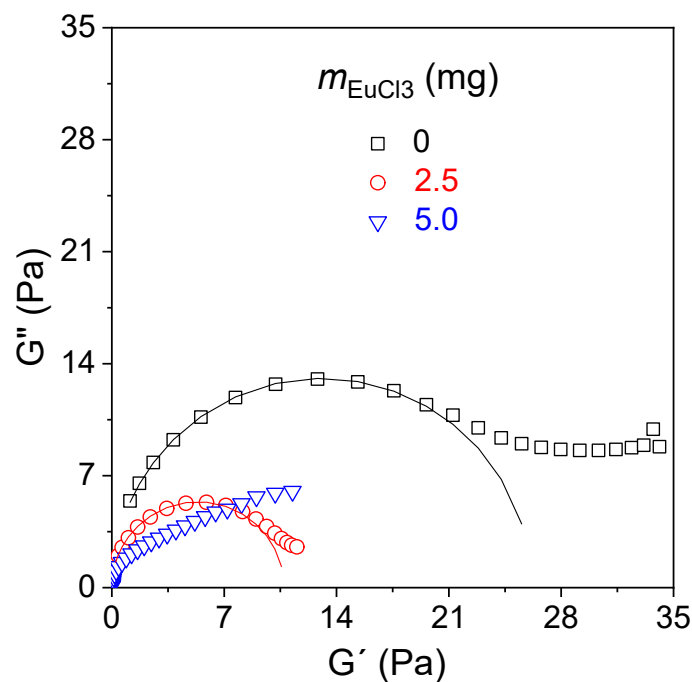

**Fig. S6** Cole-Cole plots of the data obtained from frequency sweep in oscillatory shear measurements at 4 Pa for the wormlike micellar solution (100 mmol·L<sup>-1</sup> C<sub>14</sub>DMAO and 55 mmol·L<sup>-1</sup> DPA) with 2.5 and 5.0 mg EuCl<sub>3</sub>, respectively. The data of the micellar solution without EuCl<sub>3</sub> was also given for comparison. Solid lines represent the fitting curves.

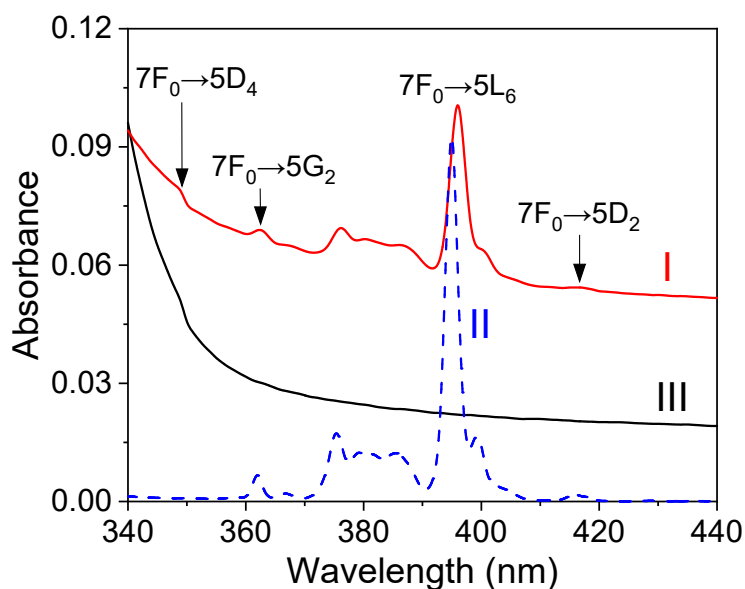

**Fig. S7** UV-vis absorption of the sample (4 mL) with 100 mmol·L<sup>-1</sup> C<sub>14</sub>DMAO, 55 mmol·L<sup>-1</sup> DPA and 22.5 mg EuCl<sub>3</sub> (curve I). The excitation curve at the maximum emission (curve II) and the absorption of the sample at the absence of EuCl<sub>3</sub> (curve III) are also given.

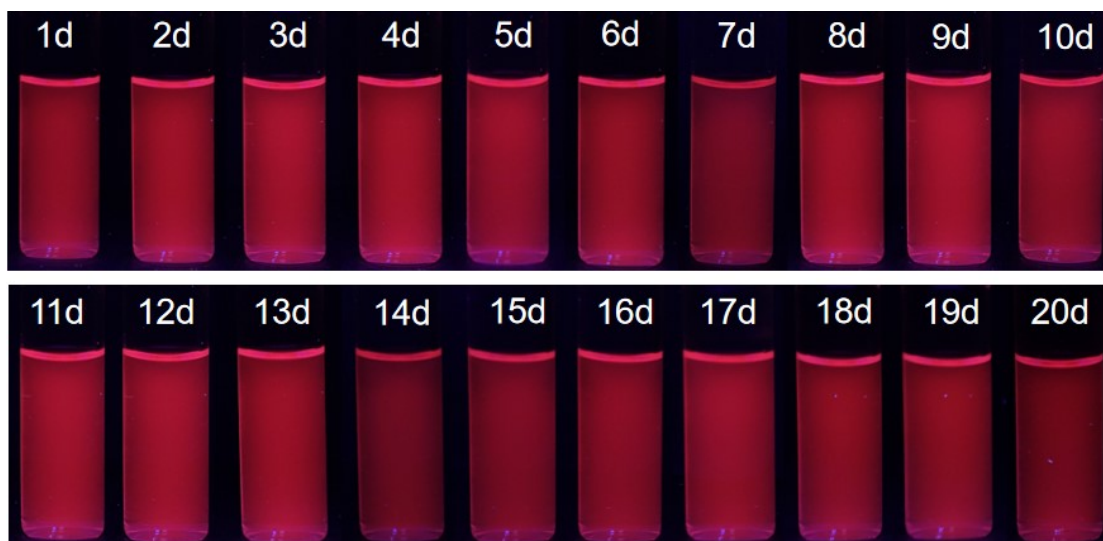

**Fig. S8** Photos of the sample (4 mL) with  $100 \text{ mmol}\cdot\text{L}^{-1}$   $\text{C}_{14}\text{DMAO}$ ,  $55 \text{ mmol L}^{-1}$  DPA and  $22.5 \text{ mg}$   $\text{EuCl}_3$ , taken under  $365 \text{ nm}$  UV irradiation.

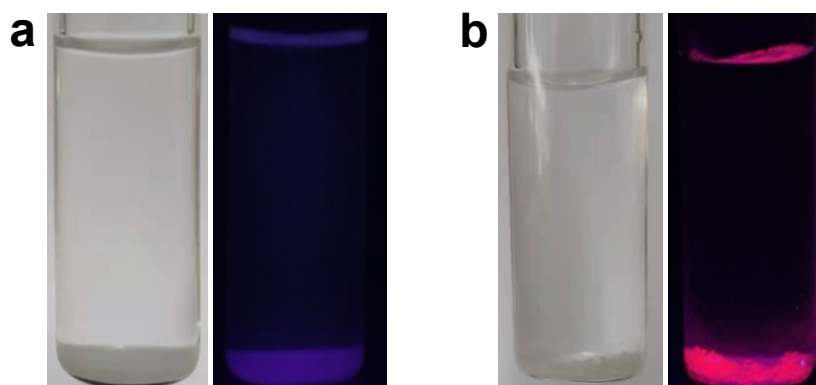

**Fig. S9** a) Photos of aqueous solution of  $55 \text{ mmol}\cdot\text{L}^{-1}$  DPA (4 mL) after addition of  $22.5 \text{ mg}$   $\text{EuCl}_3$ , taken under roomlight (left) and  $365 \text{ nm}$  UV irradiation (right). b) Photos of aqueous solution of  $100 \text{ mmol}\cdot\text{L}^{-1}$   $\text{C}_{14}\text{DMAO}$  (4 mL) after addition of  $22.5 \text{ mg}$   $\text{EuCl}_3$ . Taken under roomlight (left) and  $365 \text{ nm}$  UV irradiation (right).
